# Supplementary material for: Effect of platelet-rich plasma on rat Achilles tendon healing is related to microbiota
Source: PubMed Central journal article supplement — Acta Orthop. 2017 Mar 15;88(4):416–21. doi: 10.1080/17453674.2017.1293447 (PMC5499334; doi:10.1080/17453674.2017.1293447), 2017-03-15
Supplement: IORT_A_1293447_SM2180.pdf [file IORT_A_1293447_SM2180.pdf]

## Supplementary data

Table 2. Details of antibodies used in this study, and flow cytometer setup

| Antigen | Fluorochrome       | Stock Clone | [ ] (g/L) | Mirror:filter | CAT#   | LOT#    |
|---------|--------------------|-------------|-----------|---------------|--------|---------|
| CD45    | PE-Cy7             | OX-1        | 0.2       | 735LP:780/60  | 202214 | B151577 |
| CD3     | AF647              | 1F4         | 0.5       | -:660/20      | 201408 | B152236 |
| CD4     | PE                 | OX-35       | 0.2       | -:582/15      | 203308 | B140103 |
| CD8a    | PerCP              | OX-8        | 0.2       | 502LP:675/20  | 201712 | B140789 |
| CD25    | Biotin             | OX-39       | 0.5       | -:-           | 202111 | B152501 |
| Biotin  | Streptavidin-BV510 | N/A         | 0.1       | 502LP:510/50  | 405233 | B164013 |

[ ]: concentration; CAT#: catalog number; LOT#: lot number.

Table 3. Concentration of platelets and leukocytes in each experiment. PRP/WB means ratio

| Exp. | Platelets ( $\times 10^9/L$ ) | PRP/WB | Leukocytes ( $\times 10^9/L$ ) | Leukocytes: PRP/WB |
|------|-------------------------------|--------|--------------------------------|--------------------|
| 1    | 3,400                         | 5.1    | 0.7                            | -0.2               |
| 2    | 5,230                         | 11     | 5.8                            | 1.4                |
| 3    | 3,285                         | 7.8    | 20                             | 3.5                |
| 4    | 3,170                         | 8.5    | L-PRP = 21                     | L-PRP = 5.0        |
|      |                               |        | 7                              | 1.7                |
| 5    | 3,190                         | 7.5    | L-PRP = 23                     | L-PRP = 4.7        |
|      |                               |        | 11                             | 2.2                |
| 6    | 3,190                         | 7.5    | 9.6                            | 2.3                |

PRP: platelet rich plasma; WB: whole blood.
